# Supplementary material
Source: PubMed Central journal article supplement (PMC5005957)
Supplement: NIHMS812060-supplement-Supplementary_Table_1.pdf [file NIHMS812060-supplement-Supplementary_Table_1.pdf]

Supplementary Table I. Birth Data for Group 1 (N = 53)

| #  | Sex | Weeks<br>Gestation | BW% | BL% | OFC% |
|----|-----|--------------------|-----|-----|------|
| 1  | f   | 40                 | na  | na  | na   |
| 2  | m   | 38                 | 80  | 65  | na   |
| 3  | f   | 36                 | 75  | 35  | 75   |
| 4  | f   | 38                 | 30  | 50  | 45   |
| 5  | m   | 40                 | 95  | >95 | >95  |
| 6  | f   | 37                 | >95 | 95  | >95  |
| 7  | m   | 36                 | 75  | 95  | 90   |
| 8  | m   | 39                 | >95 | >95 | >95  |
| 9  | m   | 40                 | >95 | >95 | >95  |
| 10 | m   | 40                 | 95  | 80  | 55   |
| 11 | f   | 40                 | 70  | na  | na   |
| 12 | m   | 38                 | 75  | 80  | na   |
| 13 | f   | 38                 | 75  | 75  | 90   |
| 14 | f   | 40                 | 75  | 95  | na   |
| 15 | f   | 37                 | 95  | 90  | na   |
| 16 | m   | 39                 | 80  | 90  | 65   |
| 17 | f   | 31                 | 70  | 25  | 75   |
| 18 | f   | 40                 | 80  | na  | na   |
| 19 | m   | 40                 | >95 | 95  | >95  |
| 20 | m   | 40                 | 5   | <5  | 25   |
| 21 | m   | 40                 | 50  | 25  | 25   |
| 22 | m   | 40                 | 35  | na  | na   |
| 23 | f   | 41                 | >95 | >95 | na   |
| 24 | f   | 31                 | 80  | 75  | 55   |
| 25 | m   | 38                 | 75  | >95 | 95   |
| 26 | m   | 42                 | <5  | 25  | >95  |
| 27 | f   | 36                 | 25  | 25  | na   |
| 28 | m   | 39                 | 60  | 25  | 30   |
| 29 | m   | 39                 | 65  | 80  | 75   |
| 30 | f   | 41                 | 25  | 45  | 35   |
| 31 | m   | 40                 | 90  | 80  | 25   |
| 32 | m   | 39                 | na  | na  | na   |
| 33 | f   | 34                 | 25  | <5  | 35   |
| 34 | f   | 41                 | >95 | na  | na   |
| 35 | f   | 42                 | >95 | >95 | na   |
| 36 | f   | 40                 | <5  | 5   | na   |
| 37 | f   | 40                 | na  | na  | na   |
| 38 | m   | 40                 | 95  | >95 | 80   |
| 39 | f   | 40                 | 60  | 40  | 50   |
| 41 | f   | 40                 | 50  | na  | na   |

|    |   |    |     |     |     |
|----|---|----|-----|-----|-----|
| 42 | f | 27 | 50  | 45  | 50  |
| 45 | m | 33 | 50  | 75  | 50  |
| 47 | m | 40 | 80  | 75  | >95 |
| 48 | f | 40 | 60  | 75  | 75  |
| 50 | m | 41 | 55  | 75  | 90  |
| 52 | f | 39 | 95  | 90  | 75  |
| 53 | m | 40 | >95 | >95 | 95  |
| 56 | m | 40 | 35  | 45  | 45  |
| 57 | f | 41 | 75  | 75  | 50  |
| 59 | f | 36 | >95 | 80  | 75  |
| 61 | m | 38 | 90  | 90  | 95  |
| 62 | f | 40 | 75  | >95 | >95 |
| 64 | f | 39 | 65  | 90  | 85  |

---

Abbreviations: BW% = birth weight centile, BL% = birth length centile, OFC% = head circumference centile, na = not available.
